# Supplementary material for: A transposable element insertion in APOB causes cholesterol deficiency in Holstein cattle
Source: PubMed Central journal article supplement — Anim Genet. 2016 Jan 13;47(2):253–7. doi: 10.1111/age.12410 (PMC4849205; doi:10.1111/age.12410), 2016-01-13

**Figure S2** Long-range PCR confirmed the insertion. Flanking intronic primers for the amplification of exon 5 of the *APOB* gene were used to amplify this genomic region in an affected calf (right) and in a carrier (left). Note that the mutant allele was not amplified in the carrier animal probably due to the fact that the polymerase favoured the significantly shorter wild type allele of 249 bp. Sanger sequencing of the 1548 bp sized PCR product of the affected animal showed an insertion of 1299 bp corresponding to a transposable element (LTR element ERV2-1).

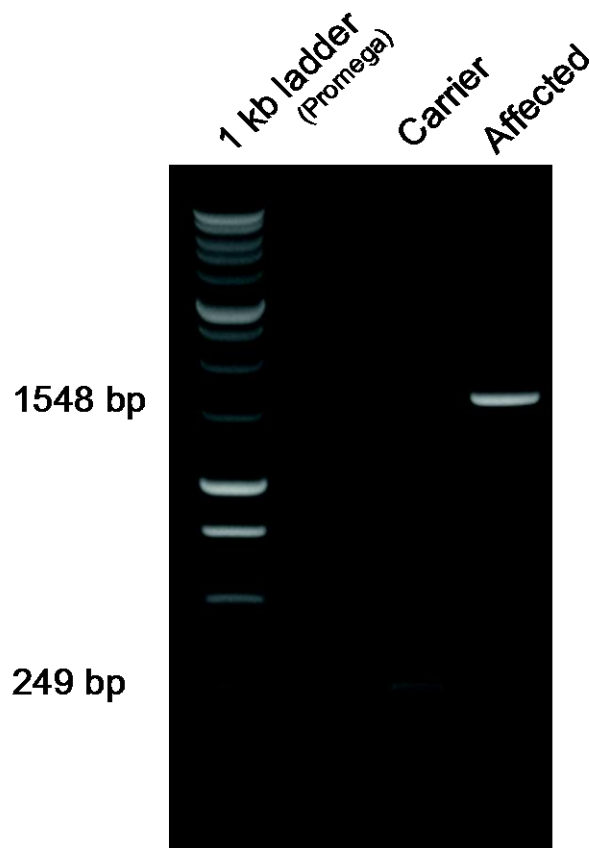

Supplement: AGE-47-253-s002.pdf [file AGE-47-253-s002.pdf]
