# Supplementary material for: A transposable element insertion in APOB causes cholesterol deficiency in Holstein cattle
Source: PubMed Central journal article supplement — Anim Genet. 2016 Jan 13;47(2):253–7. doi: 10.1111/age.12410 (PMC4849205; doi:10.1111/age.12410), 2016-01-13
Supplement: AGE-47-253-s003.pdf [file AGE-47-253-s003.pdf]

**Figure S3** Sequences of the bovine *APOB* alleles. Sequences shown in black font correspond to BTA 11: 77958946-77959194 (bovine genome assembly version UMD3.1). The exon 5 of *APOB* is highlighted in yellow. The precise location (breakpoint) of the insertion is indicated with a blue vertical bar and submitted to dbVar (<http://www.ncbi.nlm.nih.gov/dbvar>) under accession NSTD119. The sequence of the 1299 bp insertion in the affected cattle is shown in blue. The binding sites of the 3 PCR primers used for genotyping are shown underlined. Diagnostic PCR primer sequences are given below.

**Wild type allele:**

GGTGACCATCCTCTCTCTGCACCAGGTACGACCTCAAGCTGGCTGTTCC | TGAAGGCAAGCA  
 AGTTCTACTTTACCCAGAGAAAGAAGAGCCTAAACACATCCTCAACATCAAGAGGGGCATCA  
 TCTCTGCCCTCCTGCTTCCCCCAGAAACAGAAGAGGCTAAGCAAGTGTTATTTCTGGTGAGA  
 ATTTTAAAAGCTGATAATAGTGGTCCTTTGAACTCCTCTTCATATAATGGAGCTGGGTTCCA  
CT

**Mutant (with insertion) allele:**

GGTGACCATCCTCTCTCTGCACCAGGTACGACCTCAAGCTGGCTGTTCC | TGAGGTGCGGGG  
 AGCCGGTGAGGCATTCCACTCGTGACAAAGGTCATGAGGAAGGAGGCTCGGCATACGCAAAG  
 GCGGGATCGAGCCTCAGGAGTCCCCCGGATATTCTCGAGCATTTCCCCCAAAAAACCAGA  
 GTCTGCCTACTTTATTGCTTTGTGCTCTCACCTCTGACTTTACTGGGGGCTGTCCCCTACCA  
 CCGTCTCTCTCTCTCTGTGTCAAAGAGTTAACTTACAGCTCCAATTAATAAAGTTCTGGGC  
 AATTAGGAGTGTTTAAATCCAAACCCTCTGATGGCTCTCTAACTCGCCTGACAAGTTTACC  
 CGGACTCCTGCAGCTATGCATACGATTGTTTACAGTCTCCAGCCTCGAGAGGCATGGGAAG  
 CTTAAGATATTCAAATAGCTTAGAGCCTCTCAGAGAGTTAAAACTGTGAGAATAAACTAGT  
 AAAGGATTTTCATTGATGAGTCAATGCTTGTGTTGCCAAGTTTTTCACATCCCCTGAATTGTATCC  
 TTGAATATGTATCAATTAATAGTGGGTATGTAGAAAAAATAAGTAGTGGCCCTTGGTGTTA  
 GTAACTTTAGACCCTTAAGGTAATAAATTCTTTCTTTGTTGTAAACCCATTACACATCCGCC  
 CTATAGGAATGCAATTTTATCTTTGGAAGATGGTGCCAAACCCTTGAAATAAATTAATCTTAG  
 AGAAAAGTAAAGTCTTTGTTGATAAGTCTTGTCAAGAGTCATAAAATGTTTAGTAGGCCTT  
 CTGGCCAGAAGATGATGTAAATCACCTAAACCATTGTATACGATAACATTTGCAGGAAAGAA  
 ACCTTGTTTTTTGATAAGAATCAAAGACTGCTGACTTTGCATCCCCCTATTATCCTCTATGT  
 GTAACTTAGGGTATAAAAGCCCCTGTTAAAAATAAAGCTACGGGCCTTGCTCACCAACGCTT  
 GGTCTCCCCATGTCATTCTTTAACTTCCAGCTGAGTCTCCATCTGGAGCGCGGAACCCACC  
 ACGCTTACTAATCATGCCTGGGCTTCTAAGACCCACTCGAGAAGGTGTCTAGGGTGAGACAC  
 CTTCCGCTATTCGAGAGGGCGCCTGCGGCCTACGTAAGTGGTGCAAACCTTCTTGTCTTGAAG  
 TTTTATTGGTCTCCGCGTAAACCAAGCTACTCAGCTTCTTTTCTCCACTGAAATTTCTTAC  
 TGAGCTATCCTCATTCTATTGTTCTCTATATCCCTAATTAGCATATAAATAGTCGCCGACGC  
 CGTCTCCCCTTCGAATACCCTGGATCAGCCGGGGCTGGTCCTCGGCA | TGAAGGCAAGCAAG  
 TTCTACTTTACCCAGAGAAAGAAGAGCCTAAACACATCCTCAACATCAAGAGGGGCATCATC  
 TCTGCCCTCCTGCTTCCCCCAGAAACAGAAGAGGCTAAGCAAGTGTTATTTCTGGTGAGAAT  
 TTTAAAAGCTGATAATAGTGGTCCTTTGAACTCCTCTTCATATAATGGAGCTGGGTTCCACT

**Diagnostic PCR primers:**

|                          |                             |
|--------------------------|-----------------------------|
| Wild type forward primer | 5' -GGTGACCATCCTCTCTCTGC-3' |
| Wild type reverse primer | 5' -AGTGGAACCCAGCTCCATTA-3' |
| Mutant forward primer    | 5' -CACCTTCCGCTATTCGAGAG-3' |
